# Supplementary material for: Unique Structural Features Facilitate Lizard Tail Autotomy
Source: PubMed Central journal article supplement (PMC3526639; doi:10.1371/journal.pone.0051803), 2012-12-19
Supplement: pone.0051803.s002.pdf [file pone.0051803.s002.pdf]

**Table S1**

| A      | B         | C              | D                         | E                               | F                                                  | G                     | H                                                                                   |
|--------|-----------|----------------|---------------------------|---------------------------------|----------------------------------------------------|-----------------------|-------------------------------------------------------------------------------------|
| Band # | Peptide # | MH+ (observed) | Deduced peptide sequences | Peptide hits                    | Positive hits (accession and species)              | Total score IMS-BLAST | Common name and homologous proteins ("/*") identified as positive hits              |
| 1      | a)        | 2688.42        | BLVLQCGXXAGVPGFESTVEAGEG  | Alpha 2 macroglobulin,          | ref XP_002190183.1 [Taeniopygia guttata]           | 183                   | alpha 2 macroglobulin                                                               |
|        | b)        | 2241.22        | TEGLPGSNTHLQLA            | Alpha 2 macroglobulin           |                                                    |                       |                                                                                     |
|        | c)        | 1798.93        | BLLOWNDVQLQDGLTR          | no homologous                   |                                                    |                       |                                                                                     |
|        | d)        | 1422.8         | LLSGNDVQHHF               | no homologous                   |                                                    |                       |                                                                                     |
|        | e)        | 1226.64        | BALGYLVS                  | Alpha 2 macroglobulin           |                                                    |                       |                                                                                     |
| 2      | a)        | 1798.92        | BLLOWNDVQLQDGLTR          | Alpha 2 macroglobulin           | ref XP_002190183.1 [Taeniopygia guttata]           | 170                   | alpha 2 macroglobulin                                                               |
|        | b)        | 1386.72        | BVLEEGTRELQGR             | no homologous                   |                                                    |                       |                                                                                     |
|        | c)        | 1353.76        | TEGLPGSNTHLQQL            | Alpha 2 macroglobulin           |                                                    |                       |                                                                                     |
|        | d)        | 1334.72        | BFPLVYLQDPSR              | Alpha 2 macroglobulin           |                                                    |                       |                                                                                     |
|        | e)        | 1108.49        | BSQEHCYDR                 | no homologous                   |                                                    |                       |                                                                                     |
| 3      | a)        | 2090           | EDTVQLQLTR                | no homologous                   | emb CAG05099.1 [Tetraodon nigroviridis]            | 185                   | Glycogen phosphorylase                                                              |
|        | b)        | 1830.98        | LSLPVVDLAPTAR             | no homologous                   |                                                    |                       |                                                                                     |
|        | c)        | 1215.71        | BLGQWLVNTR                | no homologous                   |                                                    |                       |                                                                                     |
|        | d)        | 1566.78        | BDFNVGGYLAQVLDLDR         | Glycogen phosphorylase          |                                                    |                       |                                                                                     |
|        | e)        | 1355.76        | BDYYFALAAER               | Glycogen phosphorylase          |                                                    |                       |                                                                                     |
| 4      | a)        | 2096.11        | ENDDPXXDLSSXVR            | Alpha-fetoprotein/serum albumin | emb CAK18227.1 [Eublepharis macularius]            | 259                   | Transferrin                                                                         |
|        | b)        | 2075.99        | BLSPSALVEACSFHQDACAR      | Transferrin                     |                                                    |                       |                                                                                     |
|        | c)        | 1999.88        | BCSSPSQELYYGYTGAFR        | Transferrin                     | sp P84407.1 FETA_CHICK                             | 131                   | Alpha-fetoprotein/Serum albumin                                                     |
|        | d)        | 1675.89        | BTDDLWNLLSTVQDR           | Transferrin                     |                                                    |                       |                                                                                     |
|        | e)        | 1910.84        | QFAENHDG                  | no homologous                   |                                                    |                       |                                                                                     |
|        | f)        | 1056.55        | BSSAGWNLVGR               | Transferrin                     |                                                    |                       |                                                                                     |
|        | g)        | 1492.87        | BRHPEFSPQLLR              | Alpha-fetoprotein/serum albumin |                                                    |                       |                                                                                     |
| 5      | a)        | 1910.91        | BGXXXFAENHDGHXXR          | Serum albumin/Alpha-fetoprotein | gb AAM46105.1 [Hoplostethus maculatus]             | 218                   | Serum albumin/Alpha-fetoprotein                                                     |
|        | b)        | 1593.72        | BVCQCCSNYSYAFR            | Serum albumin/Alpha-fetoprotein |                                                    |                       |                                                                                     |
|        | c)        | 1742.83        | BCXXXPFQAFSSDNAGR         | Hemopexin-like                  | ref XP_002944396.1 [Xenopus (Silurana) tropicalis] | 67                    | Hemopexin-like                                                                      |
|        | d)        | 1492.83        | BRHPEFSPQLLR              | Hemopexin-like                  |                                                    |                       |                                                                                     |
|        | e)        | 1485.79        | BSGSPVYATFTHR             | Serum albumin/Alpha-fetoprotein | ref XP_002415879.1 [Ixodes scapularis]             | 70                    | Esterase                                                                            |
|        | f)        | 1356.85        | BRVWCMAHNALR              | Esterase                        |                                                    |                       |                                                                                     |
|        | g)        | 1199.65        | BFDPVTATVPPR              | no homologous                   |                                                    |                       |                                                                                     |
|        | h)        | 1068.58        | BNECLLSYR                 | no homologous                   |                                                    |                       |                                                                                     |
| 6      | a)        | 1900.79        | BNYCDNPEGYWLGNER          | fibrinogen                      | ref XP_002752372.1 [Callithrix jacchus]            | 203                   | Pregnancy-zone protein /a2M/Ovostatin/a1M/murine globulin/a1-proteinase inhibitor 3 |
|        | b)        | 1822.83        | BSCTFYEFTNQLDQR           | Nesprin-2 like                  |                                                    |                       |                                                                                     |
|        | c)        | 1742.97        | BLWTVLSHLEXVXXR           | Alpha 2 macroglobulin           | ref XP_002933762.1 [Xenopus (Silurana) tropicalis] | 65                    | Fibrinogen beta chain/Angiopoitin-2<br>Nesprin-2 like                               |
|        | d)        | 1422.8         | BNLSGNDVQHHFR             | no homologous                   |                                                    |                       |                                                                                     |
|        | e)        | 1513.78        | BTPDQQLLHSSXXXK           | no homologous                   |                                                    |                       |                                                                                     |
|        | f)        | 1324.65        | BHPDGSYSTFGTR             | Alpha 2 macroglobulin,          |                                                    |                       |                                                                                     |
| g)     | 1226.67   | BALGYLVSGYQR   | Alpha 2 macroglobulin     |                                 |                                                    |                       |                                                                                     |
| 7      | a)        | 2171.93        | BXXXSLMTTEDNWTLLQNR       | Fibrinogen                      | ref XP_002196458.1 [Taeniopygia guttata]           | 276                   | Fibrinogen beta chain                                                               |
|        | b)        | 1900.79        | BNYCDNPEGYWLGNER          | Fibrinogen                      |                                                    |                       |                                                                                     |
|        | c)        | 1822.83        | BSCTFYEFTNQLDQR           | Fibrinogen                      | ref XP_002192134.1 [Taeniopygia guttata]           | 246                   | Pyruvate kinase                                                                     |
|        | d)        | 1653.72        | BEPXXXAWAEDVLR            | Pyruvate kinase                 |                                                    |                       |                                                                                     |
|        | e)        | 1373.68        | BNTGLLCTLGPASR            | Pyruvate kinase                 |                                                    |                       |                                                                                     |
|        | f)        | 1253.57        | EDAGGWYVNR                | Fibrinogen                      |                                                    |                       |                                                                                     |
|        | g)        | 1043.56        | BEAEALFHR                 | Pyruvate kinase                 |                                                    |                       |                                                                                     |
| 8      | a)        | 2304.06        | LSPNDQTEFF                | Fibrinogen                      | ref NP_001080639.1 [Xenopus laevis]                | 235                   | Fibrinogen gamma chain                                                              |
|        | b)        | 2089.93        | BCQQPCEDTVQLQELTGR        | Fibrinogen                      |                                                    |                       |                                                                                     |
|        | c)        | 1713.02        | BLHLLTQSTVPYALR           | Fibrinogen                      |                                                    |                       |                                                                                     |
|        | d)        | 1215.69        | BRSDLLEVLNR               | no homologous                   |                                                    |                       |                                                                                     |
| 9      | a)        | 1804.96        | SPGALGGTTGLYEALER         | Alpha-enolase                   | gb EDL27268.1 [Mus musculus]                       | 72                    | Alpha-enolase                                                                       |
| 10     | a)        | 1657.85        | TFLVEGVSLSHAGQQR          | no homologous                   | gb AAF76899.1 [Zaocys dhumnades]                   | 93                    | Creatine kinase                                                                     |
|        | b)        | 2050.94        | RATTGTEAVQVFDLSNADR       | Creatine kinase                 |                                                    |                       |                                                                                     |
|        | c)        | 1785.95        | CKDVVLKAVGFVDPK           | no homologous                   |                                                    |                       |                                                                                     |
| 11     | a)        | 2271.94        | BRVPLAGTGETTTQGLDGLSER    | Fructose biphosphate aldolase   | gb ABF60005.1 [Polypterus senegalus]               | 266                   | Fructose biphosphate aldolase                                                       |
|        | b)        | 2130.18        | BLTPPTPSHLALLENANVLAR     | Fructose biphosphate aldolase   |                                                    |                       |                                                                                     |
| 12     | a)        | 1765.77        | BLVSWYDNEYGYSNR           | GAPDH                           | ref NP_989636.1 [Gallus gallus]                    | 281                   | glyceraldehyde-3-phosphate dehydrogenase (GAPDH)                                    |
|        | b)        | 1611.93        | BLVDGHALTLFXXR            | GAPDH                           |                                                    |                       |                                                                                     |
|        | c)        | 1570.81        | BVPXTXVSVVLTCLR           | GAPDH                           |                                                    |                       |                                                                                     |
|        | d)        | 1443.85        | BDLLHALEPLVAPR            | no homologous                   |                                                    |                       |                                                                                     |
| 13     | a)        | 1567.81        | BDVGVTVVLLGHSER           | Triosephosphate isomerase B     | ref NP_001133174.1 [Salmo salar]                   | 120                   | triosephosphate isomerase B                                                         |
|        | b)        | 1505.72        | BEAVAQLDASNFQQR           | Triosephosphate isomerase B     |                                                    |                       |                                                                                     |
|        | c)        | 1318.71        | BTLVEQLANFR               | no homologous                   |                                                    |                       |                                                                                     |
| 14     | a)        | 2205.13        | BFSVNLGQNSNFVLFHFNPR      | Galectin                        | ref NP_002299.2 [Homo sapiens]                     | 198                   | Galectin-1 / Galectin-9                                                             |
|        | b)        | 1495.74        | BFDEGGVLCNTR              | Galectin                        |                                                    |                       |                                                                                     |
|        | c)        | 1136.53        | BVAGQWGSEM(OX)R           | Galectin                        |                                                    |                       |                                                                                     |
|        | d)        | 1120.55        | BVAGQWGSEMR               | Galectin                        |                                                    |                       |                                                                                     |
|        | e)        | 973.56         | BVVAHALAHR                | no homologous                   |                                                    |                       |                                                                                     |
| 15     | a)        | 2205.13        | BFSVNLGQNSNFVLFHFNPR      | Galectin                        | ref NP_002299.2 [Homo sapiens]                     | 198                   | Galectin-1 / Galectin-9                                                             |
|        | b)        | 1885.83        | BTYFPHYDMAAGSEQLR         | Hemoglobin                      |                                                    |                       |                                                                                     |
|        | c)        | 1495.74        | BFDEGGVLCNTR              | Galectin                        | gb ABN71134.1 [Peromyscus maniculatus]             | 99                    | hemoglobin alpha subunit 1                                                          |
|        | d)        | 1136.53        | BVAGQWGSEM(OX)R           | Galectin                        |                                                    |                       |                                                                                     |
|        | e)        | 1120.55        | BVAGQWGSEMR               | Galectin                        |                                                    |                       |                                                                                     |
|        | f)        | 973.56         | BVVAHALAHR                | Hemoglobin                      |                                                    |                       |                                                                                     |
